# Supplementary material
Source: PubMed Central journal article supplement (PMC1088328)
Supplement: plntphys_pp.104.054502_2.pdf [file plntphys_pp.104.054502_2.pdf]

| Name               | MW  | # of OH group | RT (min) | Observed Major Ions                                                                        |
|--------------------|-----|---------------|----------|--------------------------------------------------------------------------------------------|
| <b>Chalcones</b>   |     |               |          |                                                                                            |
| C1                 | 224 | 1             | 10.06    | 296 [M], 295 [M-1], <b>281</b> [M-Me], 73 [Si], 203, 279                                   |
| C2                 | 240 | 2             | 11.22    | 384 [M], <b>369</b> [M-Me], 312 [M-Si], 297 [M-Si-Me], 73 [Si], 75 [C-Si], 203, 279        |
| C3                 | 240 | 2             | 11.61    | 384 [M], <b>369</b> [M-Me], 297 [M-Si-Me], 73 [Si], 75 [C-Si], 203, 279                    |
| C4                 | 240 | 2             | 11.38    | 384 [M], <b>369</b> [M-Me], 297 [M-Si-Me], 73 [Si], 75 [C-Si], 280                         |
| C5                 | 270 | 2             | 12.91    | 414 [M], <b>399</b> [M-Me], 384 [M-2Me], 343 [M-Si], 73 [Si], 75 [C-Si], 299               |
| C6                 | 256 | 3             | 12.23    | 472 [M], <b>457</b> [M-Me], 399 [M-Si], 73 [Si], 75 [C-Si], 291, 281                       |
| C7                 | 256 | 3             | 11.83    | 472 [M], <b>457</b> [M-Me], 442 [M-Me], 400 [M-Si], 73 [Si], 75 [C-Si], 291, 281           |
| C8                 | 256 | 3             | 13.30    | 472 [M], <b>457</b> [M-Me], 400 [M-Si], 73 [Si], 75 [C-Si], 291, 281                       |
| C9                 | 256 | 3             | 12.78    | 472 [M], <b>457</b> [M-Me], 400 [M-Si], 73 [Si], 75 [C-Si], 291                            |
| C10                | 272 | 4             | 12.94    | 473 [M-Si-Me], 458 [M-Si-2Me], <b>73</b> [Si], 75 [C-Si], 281                              |
| <b>Flavanone</b>   |     |               |          |                                                                                            |
| V1                 | 224 | 0             | ND       |                                                                                            |
| V2                 | 240 | 1             | 10.59    | 312 [M], <b>297</b> [M-Me], 73 [Si], 223, 177                                              |
| V3                 | 240 | 1             | 10.86    | 312 [M], 298 [M-Me], 73 [Si], 75 [C-Si], 92                                                |
| V4                 | 240 | 1             | 10.88    | 312 [M], 311 [M-1], 297 [M-15], 73 [Si], <b>92</b>                                         |
| V5                 | 270 | 1             | 11.71    | 342 [M], 386 [M+Si-2Me], 327 [M-Me], 73 [Si], <b>228</b> , 93                              |
| V6                 | 256 | 2             | 11.65    | <b>400</b> [M], 385 [M-Me], 73 [Si], 281                                                   |
| V7                 | 256 | 2             | 11.52    | <b>400</b> [M], 385 [M-Me], 73 [Si], 373, 310                                              |
| V8                 | 256 | 2             | 12.46    | <b>400</b> [M], 385 [M-Me], 327 [M-Si], 73 [Si], 294, 281, 192, 179                        |
| V9                 | 256 | 2             | 12.20    | 400 [M], 385 [M-Me], <b>281</b>                                                            |
| V10                | 272 | 3             | 13.11    | 488 [M], <b>473</b> [M-Me], 416 [M-Si], 401 [M-Si-2Me]                                     |
| <b>2-HI</b>        |     |               |          |                                                                                            |
| T1                 | 240 | 1             | 11.23    | 312 [M], 299 [M-15], 73 [Si], <b>91</b>                                                    |
| T2                 | 256 | 2             | 10.71    | 401 [M], 385 [M-Me], 313 [M-Si-Me], 296, <b>179</b>                                        |
| T3                 | 256 | 2             | 10.97    | 386 [M-Me+1], <b>371</b> [M-2Me], 73 [Si], 296, 193, 179                                   |
| T4                 | 256 | 2             | 11.24    | 400 [M], <b>385</b> [M-Me], 73 [Si], 281, 193                                              |
| T5                 | 286 | 2             | 12.37    | 430 [M], 415 [M-Me], 400 [M-2Me], 73 [Si], <b>222</b>                                      |
| T6                 | 272 | 3             | 11.70    | 488 [M], 473 [M-Me], <b>401</b> [M-Si-Me], 386 [M-Si-2Me], 73 [Si]                         |
| T7                 | 272 | 3             | 11.35    | 473 [M-Me], <b>459</b> [M-2Me], 73 [Si], 75 [C-Si], 293, 281, 179                          |
| T8                 | 272 | 3             | 12.77    | 488 [M], <b>473</b> [M-Me], 445 [M-3Me], 73 [Si]                                           |
| T9                 | 272 | 3             | 12.18    | 473 [M-Me], 401 [M-Si-Me], 386 [M-Si-2Me], 73 [Si], <b>281</b>                             |
| T10                | 288 | 4             | 12.44    | <b>489</b> [M-Si-Me], 474 [M-Si-2Me], 459 [M-Si-3Me], 432 [M-2Si], 416 [M-2Si-Me], 73 [Si] |
| <b>Isoflavone</b>  |     |               |          |                                                                                            |
| I1                 | 222 | 0             | ND       |                                                                                            |
| I2                 | 238 | 1             | 10.93    | 310 [M], <b>295</b> [M-15], 73 [Si], 226, 179                                              |
| I3                 | 238 | 1             | ND       |                                                                                            |
| I4                 | 238 | 1             | ND       |                                                                                            |
| I5                 | 268 | 1             | ND       |                                                                                            |
| I6                 | 254 | 2             | 12.64    | 398 [M], 383 [M-Me], 73 [Si], <b>400</b>                                                   |
| I7                 | 254 | 2             | 11.09    | 398 [M], 383 [M-Me], <b>161</b>                                                            |
| I8                 | 254 | 2             | 13.77    | <b>398</b> [M], 383 [M-Me], 325 [M-Si], 73 [Si], 75 [C-Si], 355                            |
| I9                 | 254 | 2             | 11.19    | <b>398</b> [M], 383 [M-Me], 73 [Si]                                                        |
| I10                | 270 | 3             | 14.10    | <b>414</b> [M-Si], 399 [M-Si-Me], 73 [Si], 75 [C-Si]                                       |
| <b>2H-flavonol</b> |     |               |          |                                                                                            |
| D1                 | 240 | 1             | 13.66    | 312 [M], <b>297</b> [M-Me], 283 [M-2Me], 73 [Si], 207, 192                                 |
| D2                 | 256 | 2             | 10.72    | <b>385</b> [M-Me], 312 [M-Si-Me], 73 [Si], 296, 179                                        |
| D3                 | 256 | 2             | 10.57    | 385 [M-Me], <b>314</b> [M-Si-Me], 73 [Si], 296, 179                                        |
| D4                 | 256 | 2             | 12.56    | 385 [M-Me], 328 [M-si], 313 [M-Si-Me], 73 [Si], <b>299</b>                                 |
| D5                 | 286 | 2             | ND       |                                                                                            |
| D6                 | 272 | 3             | ND       |                                                                                            |
| D7                 | 272 | 3             | ND       |                                                                                            |
| D8                 | 272 | 3             | 12.73    | 488 [M], 457 [M-2Me], 400 [M-Si-Me], 73 [Si], 75 [C-Si]                                    |
| D9                 | 272 | 3             | 9.21     | 488 [M], 473 [M-Me], 458 [M-2ME], 416, 401, 73 [Si], 75 [C-Si]                             |
| D10                | 288 | 4             | 14.49    | 489 [M-Si-Me], 458 [M-Si-3Me], 432 [M-2Si], 73 [Si], <b>381</b>                            |
| <b>Flavone</b>     |     |               |          |                                                                                            |
| F1                 | 222 | 0             | 10.80    | 222 [M], 205, 194, 72, 58                                                                  |
| F2                 | 238 | 1             | ND       |                                                                                            |
| F3                 | 238 | 1             | 11.54    | 310 [M], 295 [M-Me], <b>179</b>                                                            |
| F4                 | 238 | 1             | 20.92    | 310 [M], 295 [M-Me], <b>179</b>                                                            |
| F5                 | 268 | 1             | 22.47    | 340 [M], <b>325</b> [M-Me], 73 [Si]                                                        |
| F6                 | 254 | 2             | ND       |                                                                                            |
| F7                 | 254 | 2             | ND       |                                                                                            |
| F8                 | 254 | 2             | 17.13    | 397 [M], <b>383</b> [M-Me], 73 [Si]                                                        |
| F9                 | 254 | 2             | ND       |                                                                                            |
| F10                | 270 | 3             | 11.91    | 486 [M], <b>471</b> [M-Me], 458 [M-2Me], 414 [M-Si], 399 [M-Si-Me], 73 [Si]                |
