# Supplementary material
Source: PubMed Central journal article supplement (PMC1088328)

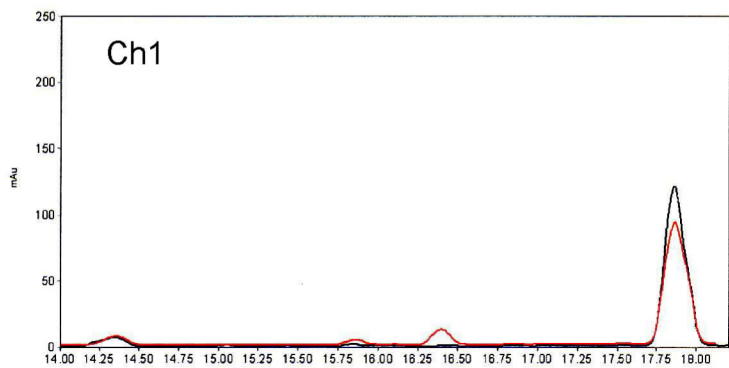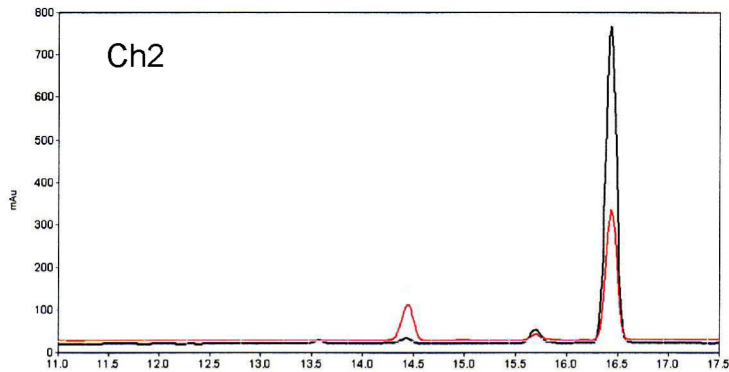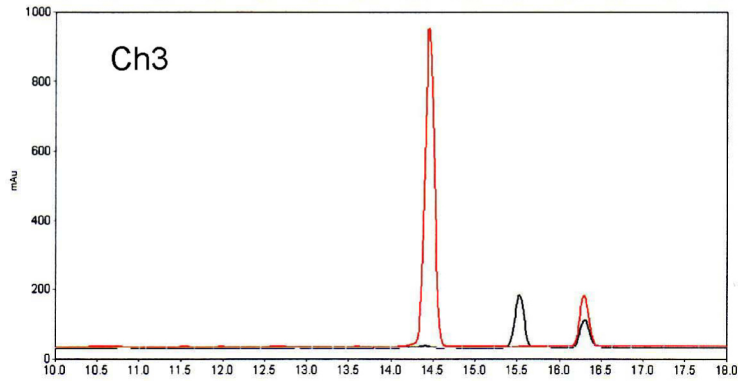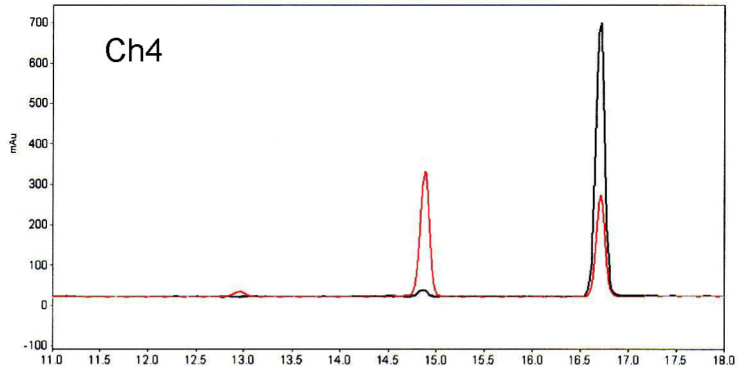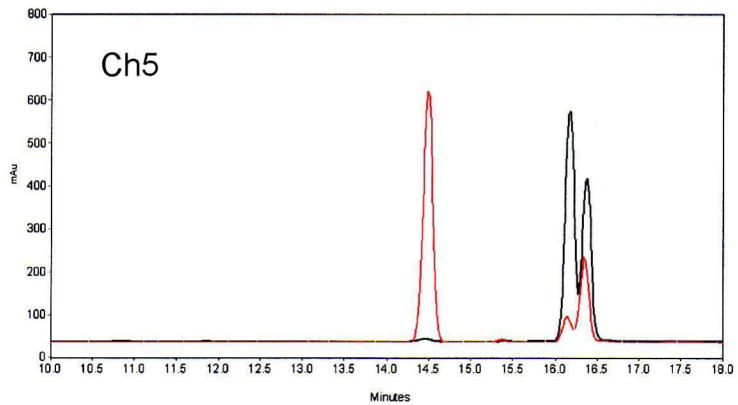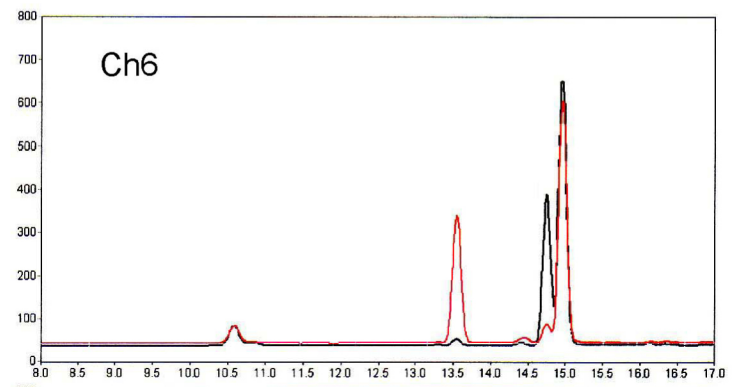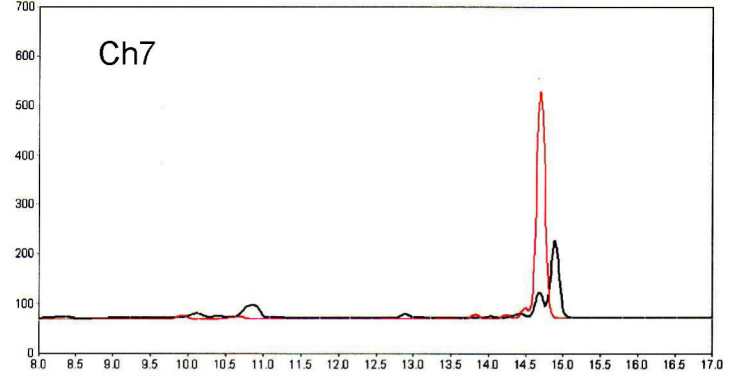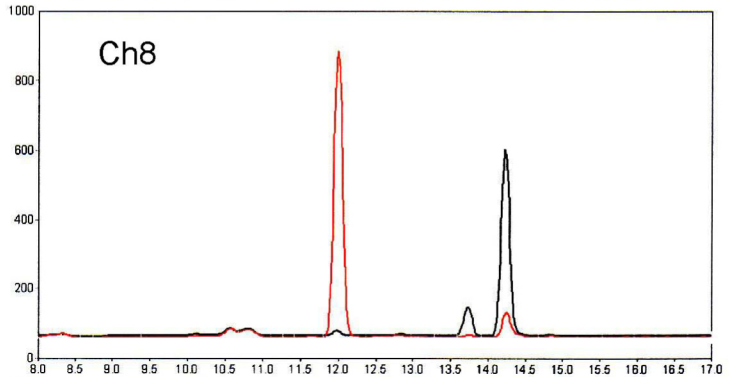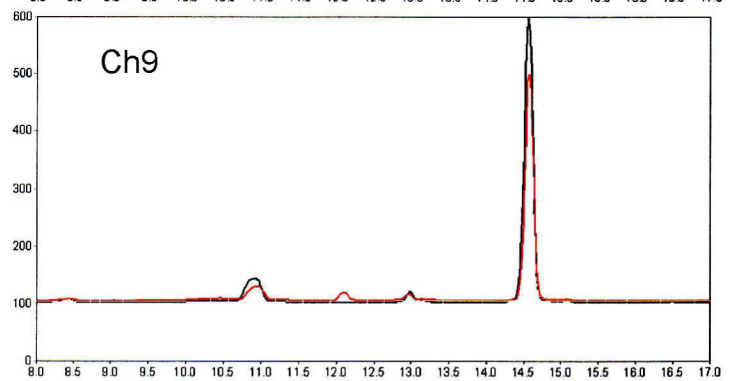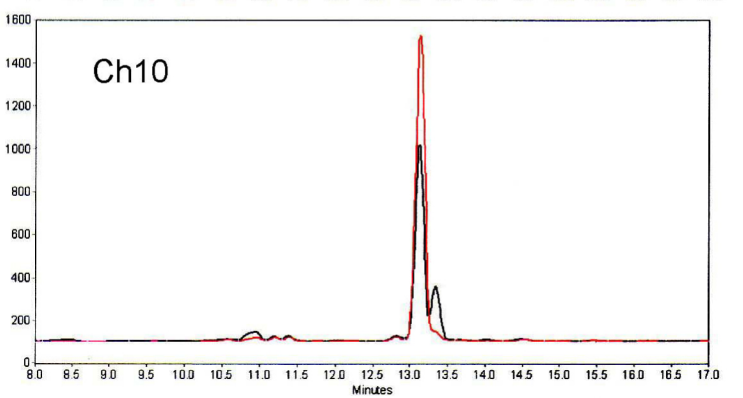

Fig S1

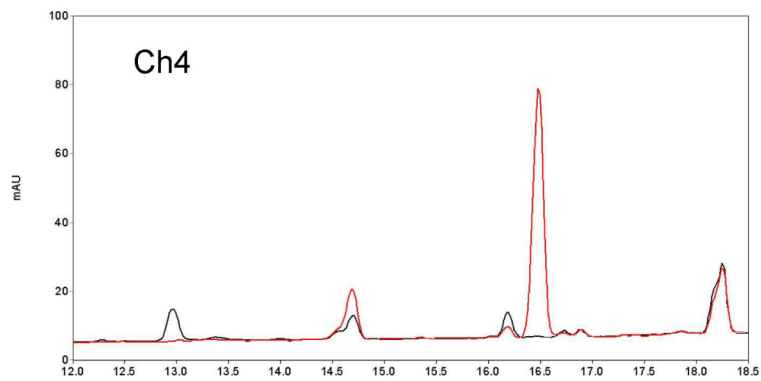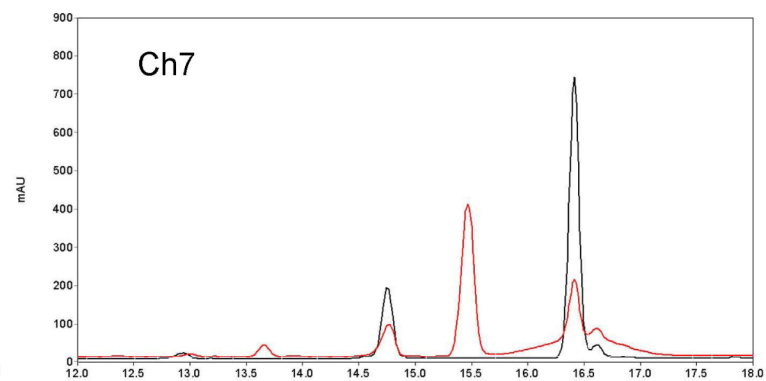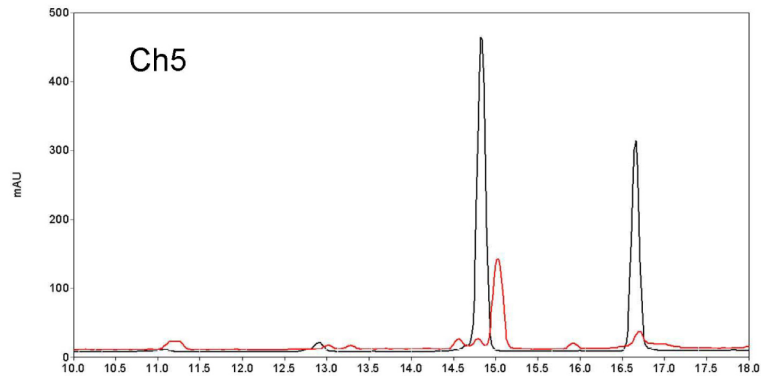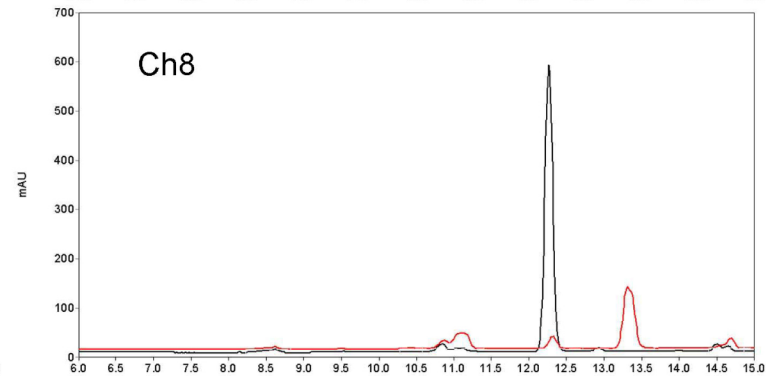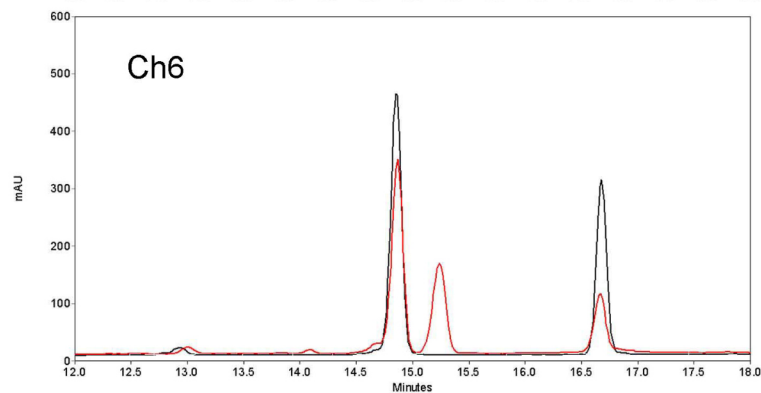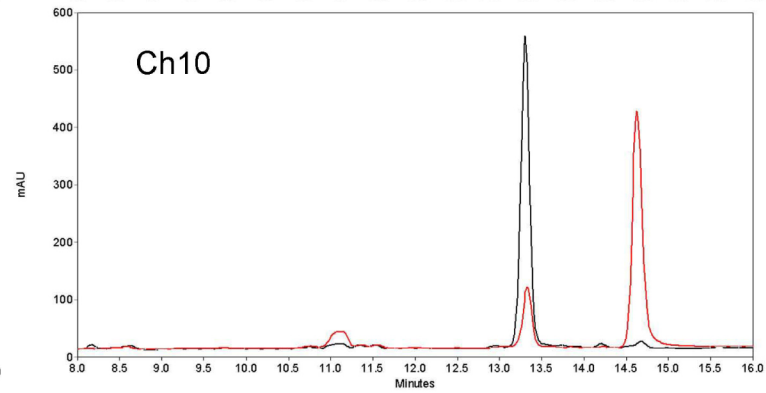

Fig S2

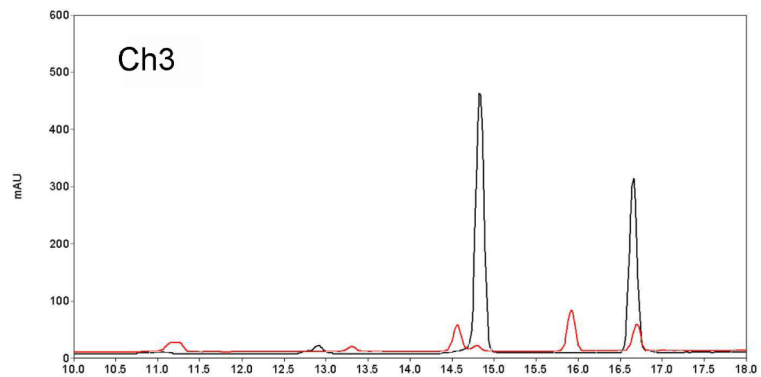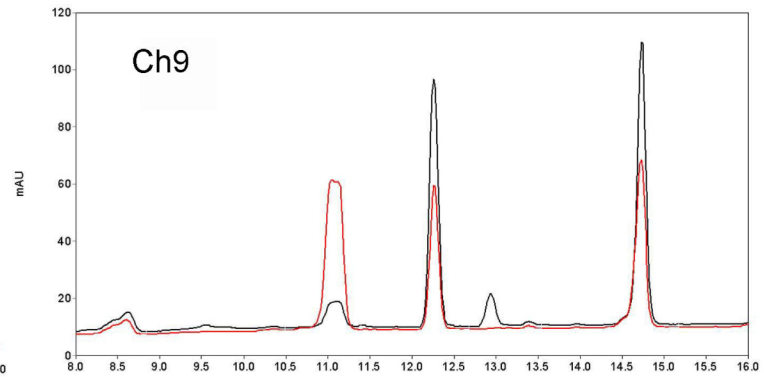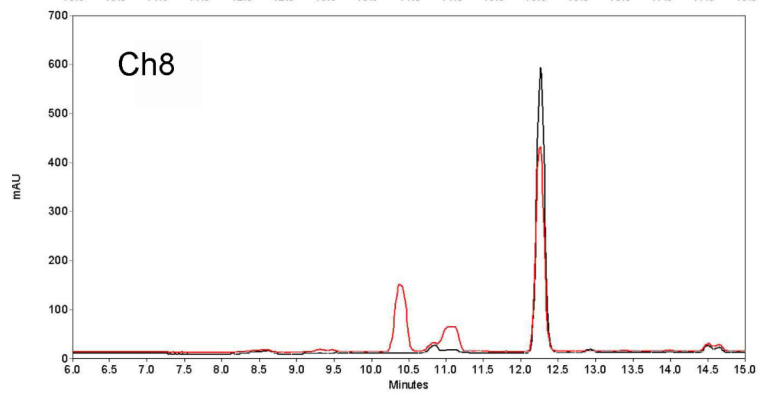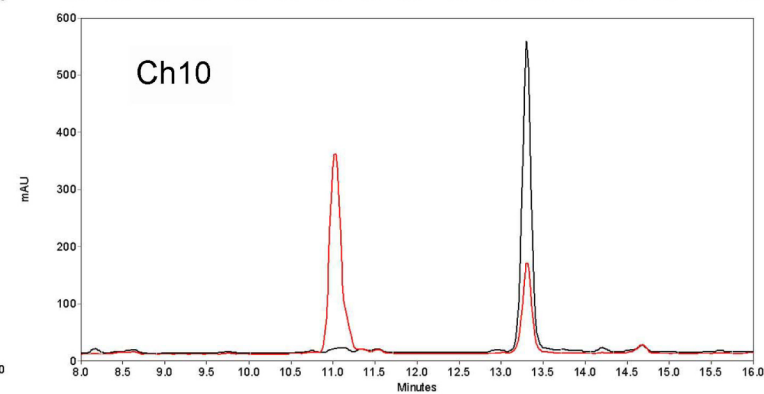

Fig S3

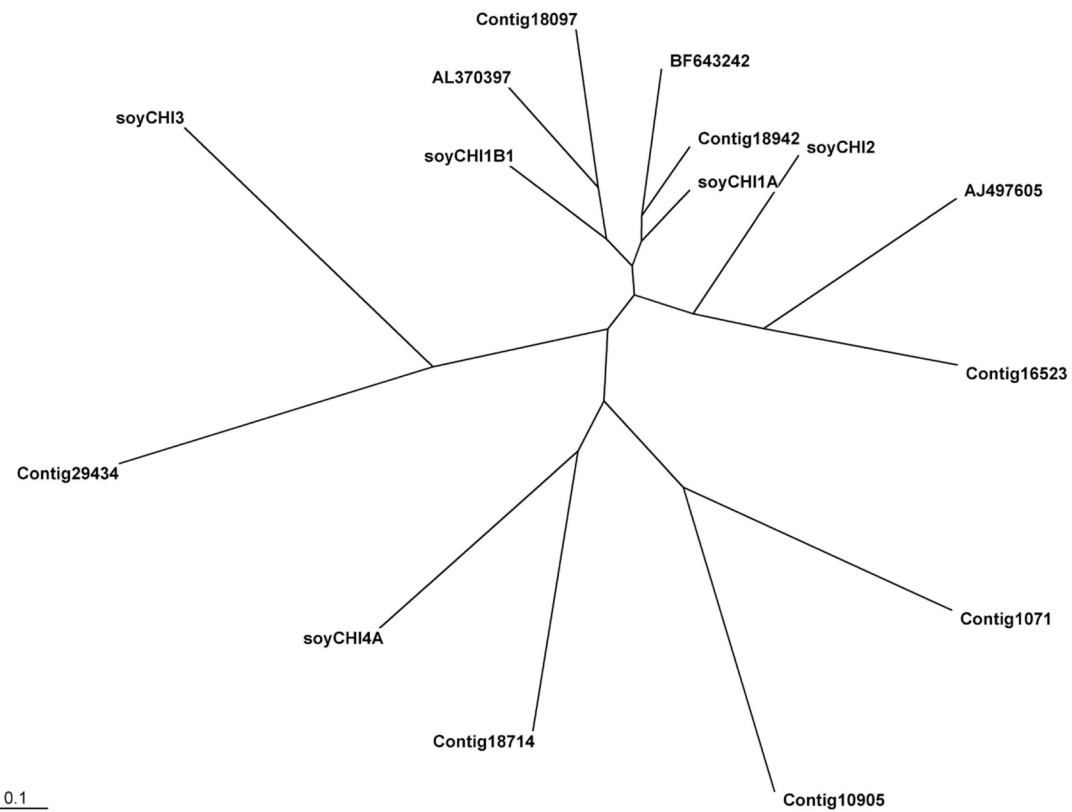

Fig S4

Supplement: plntphys_pp.104.054502_1.pdf [file plntphys_pp.104.054502_1.pdf]
